# Supplementary material
Source: PubMed Central journal article supplement (PMC5607743)
Supplement: NIHMS904525-supplement-supplement.pdf [file NIHMS904525-supplement-supplement.pdf]

## Hey and Pinho, Supplementary Information

Figure S1 Percentages of observations for 2NM (top) and  $\tau$  (bottom) by rank (species and subspecies, populations), for studies that used just 1 sequence (mtDNA) locus. See legend to Figure 2 for additional explanation.

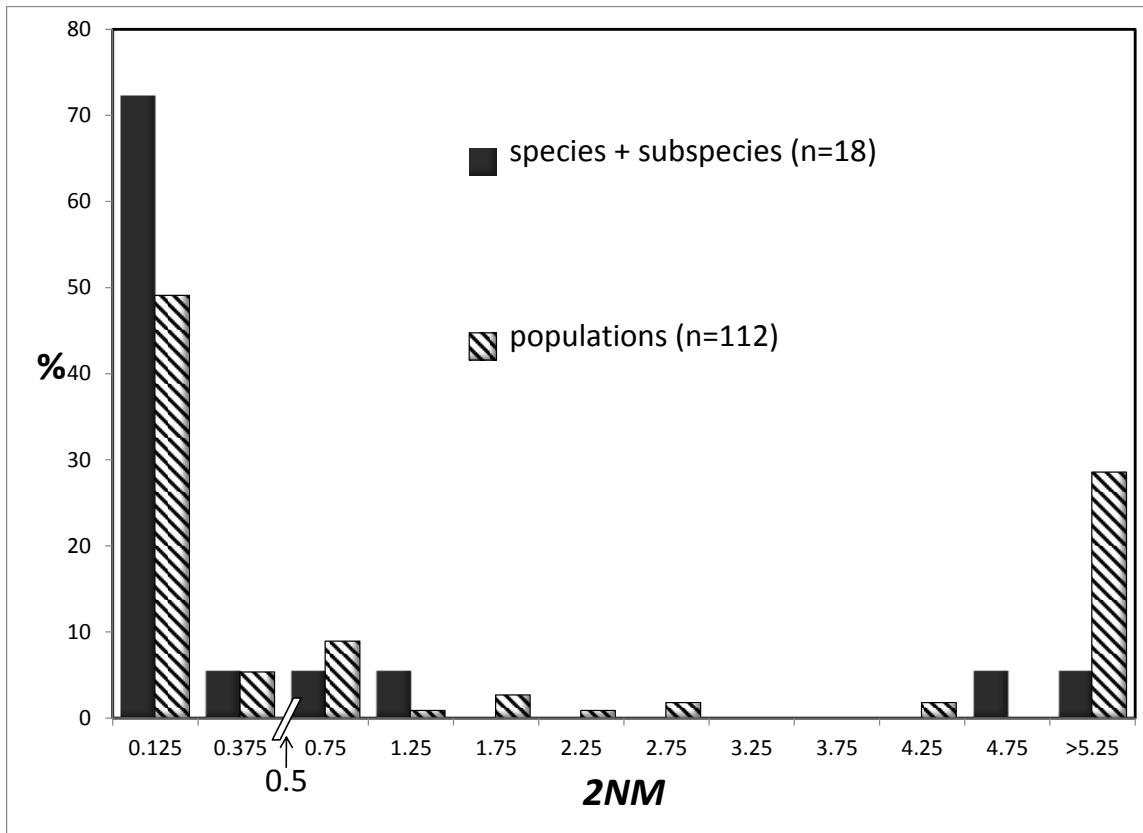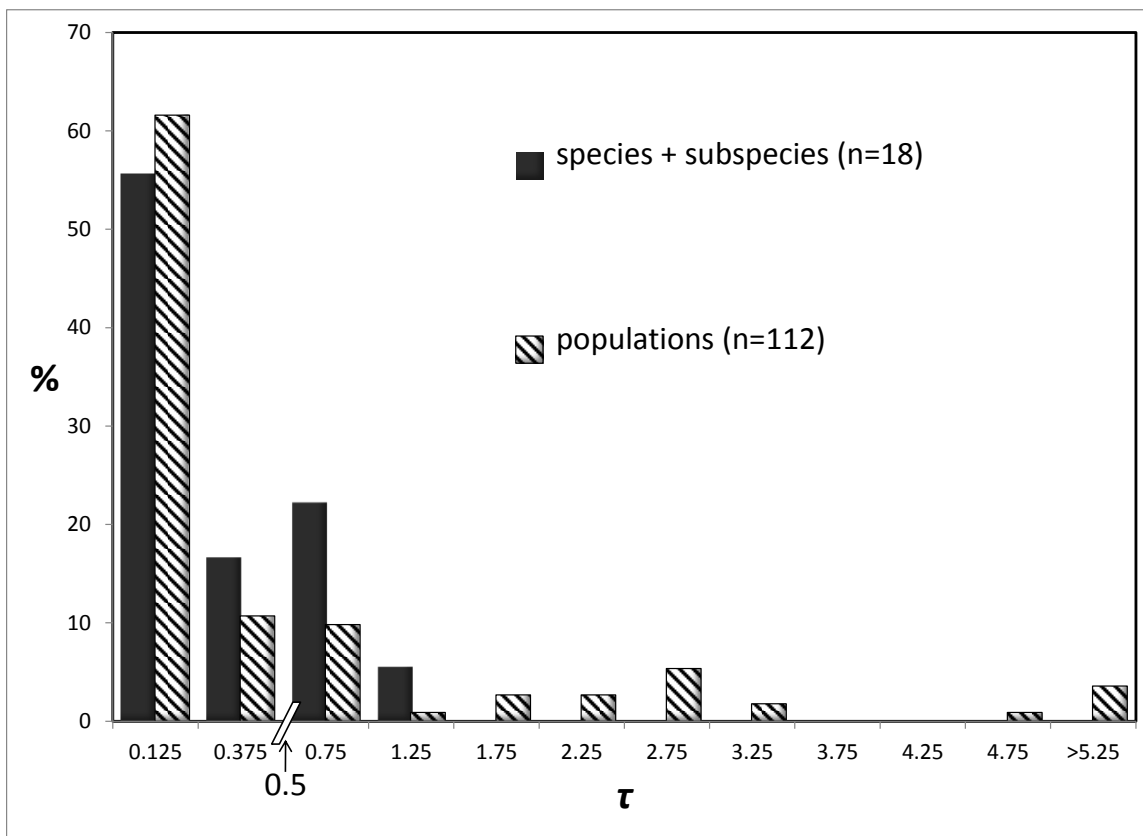

Table S1(see legend at foot of table)

| study                             | Species                        | taxon 1                                        | taxon 2                  | rank        | # loci | type of loci | Fst   | Fst Source                          | Fst ID | Fst Citation               | 2N1m1    | t1       | 2N2m2    | t2       |
|-----------------------------------|--------------------------------|------------------------------------------------|--------------------------|-------------|--------|--------------|-------|-------------------------------------|--------|----------------------------|----------|----------|----------|----------|
| (Balakrishnan and Edwards, 2009)  | <i>Taenopygia guttata</i>      | Australian                                     | Lesser Sunda             | subspecies  | 30     | seq          | 0.193 | abstract                            | Kst    | (Hudson et al., 1992a)     | 0.4414   | 0.127068 | 0.1596   | 35.055   |
| (Berner et al., 2009)             | <i>Gasterosteus aculeatus</i>  | Boot - upstream                                | Boot - downstream        | populations | 6      | STR          | 0.16  | Table 1                             | Fst    | (Weir and Cockerham, 1984) | 0.3      | 0.5917   | 2.82     | 0.810521 |
| (Berner et al., 2009)             | <i>Gasterosteus aculeatus</i>  | Joe's - upstream                               | Joe's - downstream       | populations | 6      | STR          | 0.12  | Table 1                             | Fst    | (Weir and Cockerham, 1984) | 5.68     | 0.290845 | 95.2     | 0.017007 |
| (Berner et al., 2009)             | <i>Gasterosteus aculeatus</i>  | Pye - upstream                                 | Pye - downstream         | populations | 6      | STR          | 0.14  | Table 1                             | Fst    | (Weir and Cockerham, 1984) | 0.064    | 0.251125 | 0.598    | 0.281241 |
| (Berner et al., 2009)             | <i>Gasterosteus aculeatus</i>  | Robert's - upstream                            | Robert's - downstream    | populations | 6      | STR          | 0.05  | Table 1                             | Fst    | (Weir and Cockerham, 1984) | 12.94    | 0.130139 | 14       | 0.167429 |
| (Boisselier-Dubayle et al., 2010) | <i>Pitcairnia geyskesii</i>    | Trinite                                        | Nouragues and Mt. Chauve | populations | 7      | STR          | 0.32  | Table 3                             | Fst    | (Weir and Cockerham, 1984) | 0.68     | 0.2      | 0.44     | 0.2      |
| (Boisselier-Dubayle et al., 2010) | <i>Pitcairnia geyskesii</i>    | Trinite, Nouragues and Mt. Chauve              | Bakra and Touatou        | populations | 7      | STR          | 0.452 | Table 3                             | Fst    | (Weir and Cockerham, 1984) | 0.975    | 0.12     | 0.0675   | 0.666667 |
| (Boisselier-Dubayle et al., 2010) | <i>Pitcairnia geyskesii</i>    | St. Marcel                                     | Mitaraka                 | populations | 7      | STR          | 0.693 | Table 3                             | Fst    | (Weir and Cockerham, 1984) | 0.06     | 0.4      | 0.000075 | 0.8      |
| (Boisselier-Dubayle et al., 2010) | <i>Pitcairnia geyskesii</i>    | Trinite, Nouragues, Mt. Chauve, Bakra, Touatou | St. Marcel               | populations | 7      | STR          | 0.63  | Table 3                             | Fst    | (Weir and Cockerham, 1984) | 2.575    | 0.12     | 0.021    | 1        |
| (Bolnick et al., 2008)            | <i>stickleback</i>             | Amor                                           | Ormond                   | populations | 6      | STR          | 0.249 | Table 1                             | Fst    | (Slatkin, 1995)            | 0.7735   | 0.104396 | 0.200175 | 0.403397 |
| (Bowie et al., 2009)              | <i>Scepomyceter winifredae</i> | uluguru                                        | rubeho-ukaguru           | populations | 6      | seq          | 0.7   | Calculated using data in Table 1    | Fst    | (Hudson et al., 1992b)     | 0.002027 | 0.99889  | 4.95E-09 | 0.942349 |
| (Bull et al., 2006)               | <i>Heliconius</i>              | H. melpomene                                   | H. cydno                 | species     | 4      | seq          |       |                                     |        |                            | 0.000159 | 19054.26 | 0.000696 | 4342.687 |
| (Carling et al., 2010)            | <i>Passerina</i>               | P. amoeba                                      | P. cyanea                | species     | 20     | seq          |       |                                     |        |                            | 0.4278   | 0.442029 | 0.3441   | 1.311828 |
| (Carneiro et al., 2009)           | <i>Oryctolagus cuniculus</i>   | O. c. algirus                                  | O. c. cuniculus          | subspecies  | 10     | seq          | 0.241 | Table 3, mean across loci           | Fst    | (Hudson et al., 1992b)     | 1.498    | 0.5748   | 0.0762   | 1.177091 |
| (Carstens and Knowles, 2007)      | <i>Melanoplus</i>              | M. oregonensis                                 | M. montanus              | species     | 6      | seq          |       |                                     |        |                            | 1.26525  | 0.697095 | 3.01275  | 0.627334 |
| (Carstens et al., 2009)           | <i>Plethodon idahoensis</i>    | Lochsa + Selway                                | North Fork + Clearwater  | populations | 3      | seq          |       |                                     |        |                            | 0.002366 | 0.402629 | 0.118819 | 0.432886 |
| (Carstens and Dewey, 2010)        | <i>Myotis</i>                  | M. l. alascensis                               | M. l. carisima           | subspecies  | 7      | seq          |       |                                     |        |                            | 0.856811 | 0.558356 | 0.000284 | 0.651643 |
| (Carstens and Dewey, 2010)        | <i>Myotis</i>                  | M. e. chrysonotus                              | M. l. alascensis         | species     | 7      | seq          |       |                                     |        |                            | 0.149032 | 2.03058  | 0.000393 | 2.150916 |
| (Chen et al., 2010)               | <i>Picea</i>                   | P. abies                                       | P. glauca                | species     | 10     | seq          | 0.298 | personal communication from J. Chen | Fst    | (Lynch and Crease, 1990)   | 0.01525  | 0.000588 | 0.612    | 0.000699 |
| (Chen et al., 2010)               | <i>Picea</i>                   | P. abies                                       | P. mariana               | species     | 10     | seq          | 0.395 | personal communication from J. Chen | Fst    | (Lynch and Crease, 1990)   | 0.135    | 0.000758 | 0.102    | 0.001424 |
| (Chen et al., 2010)               | <i>Picea</i>                   | P. glauca                                      | P. breweriana            | species     | 10     | seq          | 0.653 | personal communication from J. Chen | Fst    | (Lynch and Crease, 1990)   | 0.14     | 0.001281 | 0.0105   | 0.013742 |

|                               |                                    |                           |                          |             |    |         |       |                                          |                                       |                                                   |          |          |          |          |
|-------------------------------|------------------------------------|---------------------------|--------------------------|-------------|----|---------|-------|------------------------------------------|---------------------------------------|---------------------------------------------------|----------|----------|----------|----------|
| (Coelho et al., 2009)         | <i>Homo sapiens</i>                | southwest africa          | southeast africa         | populations | 2  | seq+STR |       |                                          |                                       |                                                   | 21.5     | 0.011229 | 99.5     | 0.013062 |
| (Cox et al., 2008)            | <i>Homo sapiens</i>                | BIA                       | MAN                      | populations | 20 | seq     | 0.117 | Table 1                                  | Fst                                   | (Hudson et al., 1992b)                            | 1.5124   | 0.218503 | 3.696    | 0.131764 |
| (Cox et al., 2008)            | <i>Homo sapiens</i>                | BIA                       | SAN                      | populations | 20 | seq     | 0.169 | Table 1                                  | Fst                                   | (Hudson et al., 1992b)                            | 2.1128   | 0.160586 | 0.91848  | 0.167202 |
| (Cox et al., 2008)            | <i>Homo sapiens</i>                | BIA                       | BAS                      | populations | 20 | seq     | 0.311 | Table 1                                  | Fst                                   | (Hudson et al., 1992b)                            | 0.3999   | 0.235791 | 0.715    | 0.337363 |
| (Cox et al., 2008)            | <i>Homo sapiens</i>                | BIA                       | MEL                      | populations | 20 | seq     | 0.331 | Table 1                                  | Fst                                   | (Hudson et al., 1992b)                            | 0.9798   | 0.229037 | 0.15072  | 1.006597 |
| (Cox et al., 2008)            | <i>Homo sapiens</i>                | SAN                       | MEL                      | populations | 20 | seq     | 0.39  | Table 1                                  | Fst                                   | (Hudson et al., 1992b)                            | 2.8768   | 0.136064 | 0.000242 | 1.010921 |
| (CRANDALL et al., 2008)       | <i>Nerita albicilla</i>            | Indian                    | Pacific                  | populations | 1  | seq     | 0.642 | personal communication from E. Crandall  | Φst                                   | (Excoffier et al., 2005)                          | 0.79     | 0.026778 | 0.36     | 0.057658 |
| (De Busschere et al., 2010)   | <i>Hogma</i>                       | H. galapagoensis          | H. hendrickxi            | species     | 2  | seq     | 0.8   | personal communication from F. Hendrickx | Fst                                   | (Lynch and Crease, 1990)                          | 0.885368 | 0.782799 | 0.007356 | 1.554105 |
| (de Bruyn et al., 2009)       | <i>Mirounga leonina</i>            | VLC                       | MQ                       | populations | 20 | seq     | 0.149 | Text p.3                                 | Φst                                   | (Excoffier et al., 2005)                          | 7.713225 | 0.114641 | 2.793308 | 0.003517 |
| (Dolman and Moritz, 2006)     | <i>Carlia</i>                      | C. rubrigularis S         | C. rhomboidalis          | species     | 7  | seq     | 0.47  | Table 1                                  | Fst                                   | not provided                                      | 0        | 0.741676 | 0        | 1.07309  |
| (DRUMMOND and HAMILTON, 2007) | <i>Lupinus microcarpus</i>         | var horizontalis          | var densiflorus          | subspecies  | 6  | STR     | 0.292 | Table 3                                  | "Among varieties in the total sample" | (Excoffier et al., 2005)                          | 0.5229   | 0.411647 | 0.00129  | 0.794574 |
| (Duda and Lessios, 2009)      | <i>Conus ebraeus</i>               | West and Central Pacific  | East Pacific             | populations | 1  | seq     | 0.252 | Table 2                                  | Φct                                   | (Tamura and Nei, 1993)                            | 50       | 0.000315 | 0.9045   | 14       |
| (Duda and Lee, 2009)          | <i>Conus miliaris</i>              | C. miliaris Easter Island | C. miliaris other places | populations | 1  | seq     | 0.103 | Table 3                                  | Φct                                   | (Excoffier et al., 1992)                          | 20.328   | 0.046006 | 3860.892 | 0.000545 |
| (ECKERT et al., 2008)         | <i>Pinus balfouriana</i>           | SN                        | KM                       | populations | 7  | seq     | 0.243 | mean of values in Table 2                | Φct                                   | (Excoffier et al., 2005)                          | 1.1009   | 2.018349 | 2.013    | 2.404372 |
| (Elmer et al., 2010)          | <i>Amphilophus cf. citrinellus</i> | Apoyeque                  | Managua                  | populations | 7  | seq+STR | 0.163 | personal communication from K. Elmer     | Fst                                   | (Excoffier et al., 2005);                         | 0.526222 | 1.918919 | 0.461689 | 0.047844 |
| (Farias et al., 2010)         | <i>Colossoma macropomum</i>        | Amazon Basin              | Bolivian sub-basin       | populations | 1  | seq     | 0.121 | text p. 1131                             | Φct                                   | (Excoffier et al., 2005)                          | 112.7921 | 0.002003 | 2.584235 | 0.128357 |
| (Faure et al., 2009)          | <i>Bathymodiolus</i>               | B. azoricus               | B. puteoserpentis        | species     | 8  | seq     | 0.233 | mean of values in Figure 6               | Φst                                   | (Excoffier et al., 2005)                          | 0.028968 | 0.016466 | 4.288284 | 0.088097 |
| (Fontaine et al., 2010)       | <i>Phocoena phocoena</i>           | Iberian                   | NBB                      | populations | 10 | STR     | 0.09  | personal communication from M. Fontaine  | Fst                                   | (Fontaine et al., 2007; Weir and Cockerham, 1984) | 0.34     | 0.221519 | 4.65     | 0.049575 |
| (Fontaine et al., 2010)       | <i>Phocoena phocoena</i>           | Black Sea                 | Atlantic                 | populations | 10 | STR     | 0.147 | personal communication from M. Fontaine  | Fst                                   | (Fontaine et al., 2007; Weir and Cockerham, 1984) | 0.54     | 0.366022 | 0        | 0.095118 |

|                          |                                  |                            |                           |             |    |     |          |                                         |     |                            |          |          |          |          |
|--------------------------|----------------------------------|----------------------------|---------------------------|-------------|----|-----|----------|-----------------------------------------|-----|----------------------------|----------|----------|----------|----------|
| (Garrigan et al., 2007)  | <i>Homo sapiens</i>              | Bakola                     | San                       | populations | 4  | seq |          |                                         |     |                            | 2.175    | 0.385791 | 1.2325   | 4.61E-16 |
| (Garrigan et al., 2007)  | <i>Homo sapiens</i>              | San                        | SE Bantu                  | populations | 4  | seq |          |                                         |     |                            | 2.915    | 0.457608 | 4.7925   | 0.190609 |
| (Garrigan et al., 2007)  | <i>Homo sapiens</i>              | Dogon                      | San                       | populations | 4  | seq |          |                                         |     |                            | 1.8775   | 0.376574 | 3.435    | 0.385371 |
| (Garrigan et al., 2007)  | <i>Homo sapiens</i>              | Dogon                      | Mongolian                 | populations | 4  | seq |          |                                         |     |                            | 0.57     | 0.112281 | 0.1675   | 0.014008 |
| (Garrigan et al., 2007)  | <i>Homo sapiens</i>              | Mongolian                  | Dutch                     | populations | 4  | seq |          |                                         |     |                            | 58.3825  | 0.01113  | 1.405    | 0.005468 |
| (Garrigan et al., 2007)  | <i>Homo sapiens</i>              | Sri Lankan                 | Dutch                     | populations | 4  | seq |          |                                         |     |                            | 3.405    | 0.001567 | 9.1575   | 0.001884 |
| (Geraldes et al., 2008)  | <i>Mus</i>                       | <i>M. musculus</i>         | <i>M. domesticus</i>      | species     | 8  | seq | 0.7725   | mean of values in Table 4               | Fst | (Hudson et al., 1992b)     | 0.094    | 5.701019 | 0.002    | 3.096036 |
| (Gladieux et al., 2010a) | <i>Venturia inaequalis</i>       | ViP                        | ViL                       | populations | 6  | seq | 0.257    | text p. 517                             | Kst | (Hudson et al., 1992a)     | 0.148    | 0.35     | 0        | 58.33333 |
| (Gladieux et al., 2010a) | <i>Venturia inaequalis</i>       | ViP/ViL                    | ViA                       | populations | 6  | seq | 0.247    | mean of values on pp 516, 517           | Kst | (Hudson et al., 1992a)     | 0.3564   | 6.212121 | 0.544    | 1.205882 |
| (Gladieux et al., 2010b) | <i>Venturia inaequalis</i>       | CAM                        | CAP+EU                    | populations | 10 | STR | 0.001    | personal communication from P. Gladieux | Fst | (Excoffier et al., 2005)   | 5.466667 | 0.246788 | 1.933333 | 0.1953   |
| (Hansen et al., 2008)    | <i>Coregonus</i>                 | <i>C. oxyrinchus</i> (VID) | <i>C. lavaretus</i> (RIN) | species     | 12 | STR | 0.07     | mean of values in Table 2               | Rst | (Hardy and Vekemans, 2002) | 0.939705 | 0.881013 | 17.12682 | 0.170588 |
| (Hansson et al., 2008)   | <i>Acrocephalus arundinaceus</i> | Netherlands/Germany        | Sweden/Latvia             | populations | 1  | seq | 0.04875  | Supplementary Table 1                   | Fst | (Hudson et al., 1992b)     | 91.575   | 0.021081 | 55.385   | 0.019364 |
| (Hansson et al., 2008)   | <i>Acrocephalus arundinaceus</i> | Sweden/Latvia              | Belarus/Ukraine           | populations | 1  | seq | 0.0285   | Supplementary Table 1                   | Fst | (Hudson et al., 1992b)     | 9.44325  | 0.014772 | 82.3185  | 0.018641 |
| (Hansson et al., 2008)   | <i>Acrocephalus arundinaceus</i> | Belarus/Ukraine            | Russia                    | populations | 1  | seq | 0.057    | Supplementary Table 1                   | Fst | (Hudson et al., 1992b)     | 16.60875 | 0.052713 | 10.54725 | 0.033042 |
| (Hansson et al., 2008)   | <i>Acrocephalus arundinaceus</i> | Russia                     | Kazakhstan                | populations | 1  | seq | 0.191    | Supplementary Table 1                   | Fst | (Hudson et al., 1992b)     | 65.2335  | 0.166065 | 4.329    | 0.207207 |
| (Hansson et al., 2008)   | <i>Acrocephalus arundinaceus</i> | Germany/Czech/Hungary      | Greece/Bulgaria           | populations | 1  | seq | 0.03125  | Supplementary Table 1                   | Fst | (Hudson et al., 1992b)     | 0.80775  | 0.005571 | 14.80275 | 0.004357 |
| (Hansson et al., 2008)   | <i>Acrocephalus arundinaceus</i> | Sweden/Latvia              | Belarus/Ukraine/Russia    | populations | 1  | seq | 0.0215   | Supplementary Table 1                   | Fst | (Hudson et al., 1992b)     | 0.063    | 1.357143 | 27.36125 | 0.09201  |
| (Hansson et al., 2008)   | <i>Acrocephalus arundinaceus</i> | Belarus/Ukraine/Russia     | Greece/Bulgaria           | populations | 1  | seq | 0.035833 | Supplementary Table 1                   | Fst | (Hudson et al., 1992b)     | 19.224   | 0.027778 | 12.75375 | 0.044693 |
| (Hansson et al., 2008)   | <i>Acrocephalus arundinaceus</i> | Greece/Bulgaria            | Turkey/Iran               | populations | 1  | seq | 0.373    | Supplementary Table 1                   | Fst | (Hudson et al., 1992b)     | 5.1075   | 0.118943 | 12.89475 | 0.103647 |
| (Hey and Nielsen, 2004)  | <i>Drosophila</i>                | <i>D. pseudobscura</i>     | <i>D. persimilis</i>      | species     | 14 | seq | 0.371    | calculated from raw data                | Fst | (Hudson et al., 1992b)     | 0.09     | 0.413333 | 0.11     | 0.775    |
| (Hird et al., 2010)      | <i>Tamias ruficaudus</i>         | <i>T. r. simulans</i>      | <i>T. r. ruficaudus</i>   | subspecies  | 1  | seq | 0.117    | text p. 874                             | Rst | (Excoffier et al., 2005)   | 0.285327 | 0.896997 | 0.0101   | 0.402248 |
| (Ikeda et al., 2009)     | <i>Cardamine nipponica</i>       | north                      | south                     | populations | 10 | seq | 0.417    | Abstract                                | Fst | (Hudson et al., 1992b)     | 0.000983 | 3.001017 | 0.001421 | 2.076368 |

|                               |                                |                                 |                |             |    |         |       |                                         |     |                                      |          |          |          |          |
|-------------------------------|--------------------------------|---------------------------------|----------------|-------------|----|---------|-------|-----------------------------------------|-----|--------------------------------------|----------|----------|----------|----------|
| (Johnson et al., 2007)        | <i>Chondrohierax uncinatus</i> | SA                              | CA             | populations | 1  | seq     | 0.444 | personal communication from J. Johnson  | Fst | (Excoffier et al., 2005)             | 0.413    | 0.031477 | 0.0365   | 0.356164 |
| (KING and ROALSON, 2009)      | <i>Carex</i>                   | C. macrocephala (Asia)          | C. kobomugi    | species     | 9  | seq+STR | 0.429 | text p. 473                             | Fst | (Excoffier et al., 2005)             | 0.000861 | 2.300988 | 0.011083 | 2.322581 |
| (KING and ROALSON, 2009)      | <i>Carex</i>                   | C. macrocephala (North America) | C. kobomugi    | species     | 9  | seq+STR | 0.587 | text p. 473                             | Fst | (Excoffier et al., 2005)             | 0.014212 | 3.741486 | 0.001559 | 3.1017   |
| (Koblmüller et al., 2009)     | <i>Perissodus microlepis</i>   | east of Mbete                   | west of Mbete  | populations | 1  | seq     | 0.634 | Table 5                                 | Φct | (Excoffier et al., 2005)             | 0.368177 | 0.285742 | 2.16837  | 0.674098 |
| (Kondo et al., 2008)          | <i>Icterus</i>                 | I. abeillei                     | I. galbula     | species     | 3  | seq     |       |                                         |     |                                      | 0        | 0.006074 | 0        | 0.000721 |
| (Koopman and Carstens, 2010)  | <i>Sarracenia alata</i>        | east                            | west           | populations | 8  | STR     | 0.169 | Table 3                                 | Φst | (Dyer, 2009; Excoffier et al., 1992) | 0.003307 | 0.079423 | 1.054933 | 0.139855 |
| (Kottik et al., 2008)         | <i>Rutilus frisii</i>          | Black sea                       | Caspian sea    | populations | 3  | seq     | 0.519 | mean of values in Table 4               | Fst | (Weir and Cockerham, 1984)           | 0.31066  | 2.105678 | 0.161365 | 4.88117  |
| (Kronforst et al., 2006)      | <i>Heliconius</i>              | H. cydno                        | H. pachinus    | species     | 15 | seq     |       |                                         |     |                                      | 4.326    | 0.423738 | 0.502    | 1.430908 |
| (Kronforst et al., 2006)      | <i>Heliconius</i>              | H. pachinus                     | H. melpomene   | species     | 15 | seq     |       |                                         |     |                                      | 0.11     | 1.835474 | 0.252    | 1.768825 |
| (LAWTON RAUH et al., 2007)    | <i>Dubautia</i>                | D. arborea                      | D. ciliolata   | species     | 5  | seq     | 0.14  | mean of values in Table 6               | Φct | (Excoffier et al., 1992)             | 0.7773   | 3.411306 | 0.2753   | 1.303053 |
| (LEACHÉ and MULCAHY, 2007)    | <i>Sceloporus</i>              | S. magister                     | S. bimaculosus | species     | 4  | seq     |       |                                         |     |                                      | 0.03535  | 56.83956 | 9.921422 | 2.163727 |
| (Lee and Edwards, 2008)       | <i>Malurus melanocephalus</i>  | CY                              | EF             | populations | 36 | seq     |       |                                         |     |                                      | 4.130924 | 0.266205 | 0.324632 | 0.255218 |
| (Li et al., 2010)             | <i>Leucodipteron</i>           | L. taewanus                     | L. canorum     | species     | 18 | seq     | 0.47  | Table 2                                 | Fst | (Hudson et al., 1992b)               | 170.5    | 5.227273 | 65.5     | 30.53097 |
| (Lopes and Boessenkool, 2010) | <i>Megadyptes antipodes</i>    | south island                    | subantarctic   | populations | 13 | seq+STR |       |                                         |     |                                      | 0        | 3.727273 | 36.78    | 0.030402 |
| (Malusa et al., 2007)         | <i>Ostrinia nubilalis</i>      | maize                           | mugwort        | populations | 2  | seq     | 0.06  | mean of values in Table 2               | Fct | (Excoffier et al., 2005)             | 9.793736 | 0.392646 | 9.793736 | 0.392646 |
| (Maley and Winker, 2010)      | <i>Plectrophenax</i>           | P. nivalis                      | P. hyperboreus | species     | 1  | seq     | 0.078 | text p. 790                             | Fst | (Excoffier et al., 2005)             | 753.3219 | 0.001531 | 0.049481 | 0.054358 |
| (Mao et al., 2010)            | <i>Rhinolophus pearsoni</i>    | R. p. chinensis                 | R. p. pearsoni | subspecies  | 3  | seq     | 0.59  | personal communication from S. Rossiter | Rst | (Slatkin, 1995)                      | 0.012656 | 0.28     | 2.338002 | 0.156018 |
| (Marko et al., 2010)          | <i>Balanus glandula</i>        | COR                             | SIT            | populations | 1  | seq     |       |                                         |     |                                      | 0        | 0.018489 | 0        | 0.022767 |
| (Marko et al., 2010)          | <i>Balanus glandula</i>        | SIT                             | JUN            | populations | 1  | seq     |       |                                         |     |                                      | 0        | 0.010525 | 0        | 0.006705 |
| (Marko et al., 2010)          | <i>Balanus glandula</i>        | JUN                             | RUP            | populations | 1  | seq     |       |                                         |     |                                      | 274.215  | 0.104271 | 242.4    | 0.117956 |
| (Marko et al., 2010)          | <i>Balanus glandula</i>        | RUP                             | REN            | populations | 1  | seq     |       |                                         |     |                                      | 0        | 0.046306 | 0        | 0.003173 |
| (Marko et al., 2010)          | <i>Balanus glandula</i>        | REN                             | SJI            | populations | 1  | seq     |       |                                         |     |                                      | 4141.585 | 0.01354  | 15579.43 | 0.003599 |

|                                 |                                |                   |                  |             |    |     |       |                           |     |                          |          |          |          |          |
|---------------------------------|--------------------------------|-------------------|------------------|-------------|----|-----|-------|---------------------------|-----|--------------------------|----------|----------|----------|----------|
| (Marko et al., 2010)            | <i>Patiria miniata</i>         | VC                | DUN              | populations | 1  | seq |       |                           |     |                          | 9.5407   | 0.05333  | 0        | 0.05333  |
| (Marko et al., 2010)            | <i>Patiria miniata</i>         | DUN               | WIN              | populations | 1  | seq |       |                           |     |                          | 0.0138   | 0.302435 | 5.796    | 0.302435 |
| (Marko et al., 2010)            | <i>Patiria miniata</i>         | WIN               | AP               | populations | 1  | seq |       |                           |     |                          | 2.925    | 0.099615 | 0.195    | 0.099615 |
| (Marko et al., 2010)            | <i>Xiphister mucosus</i>       | SIT               | SJI              | populations | 1  | seq |       |                           |     |                          | 0.17908  | 0        | 0.220825 | 0        |
| (Marko et al., 2010)            | <i>Xiphister atropurpureus</i> | SIT               | HG               | populations | 1  | seq |       |                           |     |                          | 0.2607   | 0.688392 | 0.2607   | 0.688392 |
| (Marko et al., 2010)            | <i>Xiphister atropurpureus</i> | HG                | CAM              | populations | 1  | seq |       |                           |     |                          | 7.3831   | 0.777713 | 0        | 2.067302 |
| (Marko et al., 2010)            | <i>Xiphister atropurpureus</i> | CAM               | SJI              | populations | 1  | seq |       |                           |     |                          | 0.835875 | 0.970871 | 0.835875 | 0.970871 |
| (Marko et al., 2010)            | <i>Nucella lamellosa</i>       | KOD               | COR              | populations | 1  | seq |       |                           |     |                          | 0        | 0.552462 | 0        | 2.765188 |
| (Marko et al., 2010)            | <i>Nucella lamellosa</i>       | COR               | SIT              | populations | 1  | seq |       |                           |     |                          | 0        | 2.585503 | 0        | 0.009038 |
| (Marko et al., 2010)            | <i>Nucella lamellosa</i>       | SIT               | JUN              | populations | 1  | seq |       |                           |     |                          | 0        | 0.310906 | 0        | 2.869897 |
| (Marko et al., 2010)            | <i>Nucella lamellosa</i>       | JUN               | WRA              | populations | 1  | seq |       |                           |     |                          | 0        | 0.979869 | 0        | 0.020899 |
| (Marko et al., 2010)            | <i>Nucella lamellosa</i>       | WRA               | KET              | populations | 1  | seq |       |                           |     |                          | 0        | 0.002486 | 0        | 0.000991 |
| (Marko et al., 2010)            | <i>Nucella lamellosa</i>       | RUP               | SJB              | populations | 1  | seq |       |                           |     |                          | 1962     | 0.145156 | 0        | 0.145156 |
| (Marko et al., 2010)            | <i>Nucella lamellosa</i>       | SJB               | CAM              | populations | 1  | seq |       |                           |     |                          | 0        | 0.307002 | 0.0484   | 0.35838  |
| (Marko et al., 2010)            | <i>Nucella lamellosa</i>       | CAM               | SJI              | populations | 1  | seq |       |                           |     |                          | 0.31095  | 1.797858 | 0        | 0.562136 |
| (Marko et al., 2010)            | <i>Nucella lamellosa</i>       | SJB               | BAM              | populations | 1  | seq |       |                           |     |                          | 0        | 1.864545 | 0        | 2.402845 |
| (Marko et al., 2010)            | <i>Nucella lamellosa</i>       | BAM               | SJI              | populations | 1  | seq |       |                           |     |                          | 0.002    | 0.3516   | 0        | 0.013884 |
| (Maroja et al., 2009)           | <i>Gryllus</i>                 | G. pennsylvanicus | G. firmus        | species     | 8  | seq | 0.193 | mean of values in Table 4 | Fct | (Excoffier et al., 1992) | 0        | 0.170466 | 4.077    | 0.357297 |
| (Viaud-Martínez et al., 2007)   | <i>Phocoena phocoena</i>       | Eastern region    | Eastern Atlantic | populations | 1  | seq | 0.312 | text p. 285               | Fst | (Excoffier et al., 1992) | 0        | 0.125444 | 0        | 0.121143 |
| (Martínez-Cruz and Godoy, 2007) | <i>Aquila</i>                  | A. adalberti      | A. heliaca       | species     | 8  | STR |       |                           |     |                          | 0.94545  | 1.413613 | 0        | 0.75419  |
| (Mazzoni et al., 2008)          | <i>Lutzomyia</i>               | L. whitmani       | L. intermedia    | species     | 10 | seq | 0.386 | mean of values            | Fst | (Lynch and Crease, 1990) | 0.138056 | 0.926362 | 0.001627 | 1.626306 |

|                               |                              |                               |                               |             |   |     |       |                                            |     |                          |          |          |          |          |
|-------------------------------|------------------------------|-------------------------------|-------------------------------|-------------|---|-----|-------|--------------------------------------------|-----|--------------------------|----------|----------|----------|----------|
|                               |                              |                               |                               |             |   |     |       | in Table 2                                 |     |                          |          |          |          |          |
| (Morgan et al., 2010)         | <i>Anopheles</i>             | A. dirus N Thailand           | A. baimaii N Thailand         | species     | 3 | seq | 0.204 | mean of values in Table 3                  | Fst | (Excoffier et al., 2005) | 1.293435 | 0.568312 | 0.826625 | 0.763496 |
| (Morgan et al., 2010)         | <i>Anopheles</i>             | A. dirus N Thailand           | A. scanloni                   | species     | 3 | seq | 0.36  | mean of values in Table 3                  | Fst | (Excoffier et al., 2005) | 1.730484 | 0.630309 | 0.00766  | 1.210836 |
| (Morgan et al., 2010)         | <i>Anopheles</i>             | A. baimaii N Thailand         | A. scanloni                   | species     | 3 | seq | 0.533 | mean of values in Table 3                  | Fst | (Excoffier et al., 2005) | 0.292953 | 0.673095 | 0.26433  | 1.307116 |
| (Morgan et al., 2010)         | <i>Anopheles</i>             | A. baimaii N Thailand         | A. baimaii India              | populations | 3 | seq | 0.092 | mean of values in Table 3                  | Fst | (Excoffier et al., 2005) | 0.359813 | 0.369984 | 0.058684 | 0.308517 |
| (Mullen et al., 2008)         | <i>Limnitis arthemis</i>     | L. a. arthemis                | L. a. astyanax                | subspecies  | 8 | seq |       |                                            |     |                          | 0.319814 | 0.118979 | 0.137453 | 0.094805 |
| (Nadachowska and Babik, 2009) | <i>Lissotriton</i>           | L. vulgaris                   | L. kosswigi                   | species     | 9 | seq | 0.807 | personal communication from K. Nadachowska | Fst | (Tamura and Nei, 1993)   | 0        | 2.554878 | 0.177675 | 2.711974 |
| (NAGATA et al., 2009)         | <i>Carabus arrowianus</i>    | S group                       | L group                       | populations | 1 | seq | 0.26  | Table 1                                    | Fct | (Excoffier et al., 1992) | 4.131225 | 0.065053 | 1.656675 | 0.011318 |
| (Noonan and Gaucher, 2005)    | <i>Atelopus</i>              | A. flavescens                 | A. franciscus                 | species     | 1 | seq |       |                                            |     |                          | 0.1      | 0.028371 | 0.09     | 0.605286 |
| (Noonan and Gaucher, 2005)    | <i>Atelopus</i>              | A. franciscus                 | Pic Matecho (A. vermiculatus) | species     | 1 | seq |       |                                            |     |                          | 0.08     | 0.111579 | 0.1      | 0.049251 |
| (Noonan and Gaucher, 2005)    | <i>Atelopus</i>              | Pic Matecho (A. vermiculatus) | A.s. barbotini                | species     | 1 | seq |       |                                            |     |                          | 0.03     | 0.075972 | 1        | 0.096667 |
| (Noonan and Gaucher, 2005)    | <i>Atelopus</i>              | A.s. barbotini                | A. s. hoogmoedi               | subspecies  | 1 | seq |       |                                            |     |                          | 0.61     | 0.842264 | 0.01     | 1.141688 |
| (Norgate et al., 2009)        | <i>Heteronympha merope</i>   | Mainland                      | Tasmania                      | populations | 1 | seq | 0.257 | personal communication from P. Sunnucks    | Φst | (Excoffier et al., 2005) | 0.034087 | 0.011617 | 16.5587  | 0.020053 |
| (Norgate et al., 2009)        | <i>Heteronympha merope</i>   | Mainland                      | Carnarvon Gorge               | populations | 1 | seq | 0.169 | personal communication from P. Sunnucks    | Φst | (Excoffier et al., 2005) | 0.126938 | 0.006736 | 0        | 0.261069 |
| (O'Corry-Crowe et al., 2010)  | <i>Delphinapterus leucas</i> | Beaufort sea                  | Svalbard                      | populations | 1 | seq | 0.029 | values for microsatellites in Table 3      | Fst | (Excoffier et al., 1992) | 1.500584 | 0.016416 | 0.548913 | 0.181894 |
| (Ohshima and Yoshizawa, 2010) | <i>Acrocercops transecta</i> | juglans                       | lyonia                        | populations | 4 | seq | 0.475 | mean of values in Supplementary Table 4    | Fst | not provided             | 1.467828 | 0.73573  | 0.170076 | 2.27501  |
| (Omilian and Lynch, 2009)     | <i>Daphnia</i>               | D. pulex                      | D. pulicaria                  | species     | 6 | seq |       |                                            |     |                          | 0.1941   | 0.193199 | 0.48535  | 0.437828 |
| (Oosterhout et al., 2006)     | <i>Poecilia reticulata</i>   | LA                            | UA                            | populations | 8 | STR | 0.156 | text p. 2566                               | Gst | (Nei, 1973)              | 0.537    | 0.376519 | 0.126    | 8.341346 |



|                                 |                                     |                        |                                                          |             |    |         |         |                                            |     |                            |          |          |          |          |
|---------------------------------|-------------------------------------|------------------------|----------------------------------------------------------|-------------|----|---------|---------|--------------------------------------------|-----|----------------------------|----------|----------|----------|----------|
| (Osada et al., 2010)            | <i>Macaca fascicularis</i>          | Sunda                  | Philippines                                              | populations | 54 | seq     | 0.17    | mean of values on p. 2887                  | Fst | (Lynch and Crease, 1990)   | 2.23     | 0.71489  | 0.56     | 6.123188 |
| (Osada et al., 2010)            | <i>Macaca</i>                       | <i>M. fascicularis</i> | <i>M. mulatta</i>                                        | species     | 54 | seq     | 0.322   | mean of values in Table 3                  | Fst | (Lynch and Crease, 1990)   | 0.44     | 0.698273 | 0.35     | 1.151515 |
| (Pavey et al., 2010)            | <i>Onchorhynchus nerka</i>          | beach                  | outlet                                                   | populations | 6  | STR     | 0.0112  | text p. 1777                               | Fst | (Weir and Cockerham, 1984) | 0.1588   | 0.01398  | 0.25344  | 0.021023 |
| (Peters et al., 2007)           | <i>Anas</i>                         | <i>A. falcata</i>      | <i>A. strepera</i>                                       | species     | 2  | seq     |         |                                            |     |                            | 0.00098  | 1.102041 | 0.0546   | 1.928571 |
| (Peters et al., 2008)           | <i>Anas strepera</i>                | <i>A. strepera</i> OW  | <i>A. strepera</i> NW                                    | populations | 6  | seq+STR |         |                                            |     |                            | 2.5      | 0.017992 | 7.7      | 0.098107 |
| (Peters et al., 2005)           | <i>Aix sponsa</i>                   | west                   | east                                                     | populations | 1  | seq     | 0.31    | text p. 3413                               | Φst | (Excoffier et al., 1992)   | 0.1554   | 0.52381  | 5.587    | 0.01457  |
| (Rawson and Harper, 2009)       | <i>Mytilus trossulus</i>            | Pacific                | NW Atlantic                                              | populations | 1  | seq     |         |                                            |     |                            | 0.021672 | 0.039129 | 24.06325 | 0.004198 |
| (Riginos, 2005)                 | <i>Axoclinus nigricaudus</i>        | Upper Gulf             | Central Gulf                                             | populations | 1  | seq     | 0.29    | Table 4                                    | Φct | (Excoffier et al., 1992)   | 0        | 0.118044 | 0        | 0.006803 |
| (Riginos, 2005)                 | <i>Coralliozetus micropes</i>       | Upper Gulf             | Central Gulf                                             | populations | 1  | seq     | 0.34    | Table 4                                    | Φct | (Excoffier et al., 1992)   | 0        | 0.102151 | 0        | 2.923077 |
| (Riginos, 2005)                 | <i>Malacoctenus hubbsi</i>          | Upper Gulf             | Central Gulf                                             | populations | 1  | seq     | 0       | Table 4                                    | Φct | (Excoffier et al., 1992)   | 0        | 0.208333 | 98.5739  | 0.008385 |
| (Riginos, 2005)                 | <i>Girella nigricans</i>            | Upper Gulf             | Central Gulf                                             | populations | 1  | seq     | 0.05    | Table 4                                    | Φct | (Excoffier et al., 1992)   | 165.6325 | 0.015199 | 134.9759 | 0.01928  |
| (Riginos, 2005)                 | <i>Paralabrax maculatofasciatus</i> | Upper Gulf             | Central Gulf                                             | populations | 1  | seq     |         |                                            |     |                            | 0.0008   | 46       | 0.126    | 7.666667 |
| (Rona et al., 2010)             | <i>Anopheles cruzii</i>             | Itaparica              | Florianopolis                                            | populations | 6  | seq     | 0.788   | mean of values in Table 3                  | Fst | (Lynch and Crease, 1990)   | 0.000224 | 5.715217 | 0.000174 | 4.095379 |
| (Russell et al., 2008a)         | <i>Trienops</i>                     | <i>T. rufus</i>        | <i>T. persicus</i>                                       | species     | 1  | seq     |         |                                            |     |                            | 0        | 0.673684 | 0        | 0.122137 |
| (Russell et al., 2008b)         | <i>Myzopoda</i>                     | <i>M. schliemanni</i>  | <i>M. aurita</i>                                         | species     | 1  | seq     |         |                                            |     |                            | 0.053852 | 0.298186 | 0.053099 | 0.302414 |
| (Salazar et al., 2008)          | <i>Heliconius</i>                   | <i>H. cydno</i>        | <i>H. melpomene</i>                                      | species     | 6  | seq     | 0.374   | mean of values in Table 3                  | Fst | (Lynch and Crease, 1990)   | 0.721232 | 1.176471 | 0        | 0.487805 |
| (Schoville and Roderick, 2009)  | <i>Parnassius</i>                   | <i>P. behrii</i>       | <i>P. smintheus</i>                                      | species     | 3  | seq     | 0.507   | personal communication from S. Schoville   | Fst | (Hudson et al., 1992b)     | 0.734367 | 0.227698 | 3.453795 | 0.076796 |
| (Storchova et al., 2010)        | <i>Luscinia</i>                     | <i>L. megarhynchos</i> | <i>L. luscinia</i>                                       | species     | 12 | seq     | 0.46    | mean of values in Table 2                  | Fst | (Hudson et al., 1992a)     | 0.118426 | 2.056031 | 0.325948 | 1.080906 |
| (Strasburg and Rieseberg, 2008) | <i>Helianthus</i>                   | <i>H. annus</i>        | <i>H. petiolaris</i>                                     | species     | 18 | seq     | 0.306   | personal communication from J. Strasburg   | Fst | (Hudson et al., 1992b)     | 0.6096   | 0.299213 | 1.16655  | 0.214993 |
| (Stukenbrock et al., 2007)      | <i>Mycosphaerella</i>               | <i>M. graminicola</i>  | S1 (unidentified wild species of <i>Mycosphaerella</i> ) | species     | 6  | seq     | 0.06309 | personal communication from E. Stukenbrock | Gst | Nei 1973                   | 7.6875   | 0.008195 | 0.208    | 1.615385 |
| (Taylor et al., 2008)           | <i>Salvelinus</i>                   | <i>S. malma</i>        | <i>S. alpinus</i>                                        | species     | 1  | seq     | 0.15    | personal communication from R. Taylor      | Fst | (Weir and Cockerham, 1984) | 0.03555  | 0.046976 | 4.6575   | 0.053784 |

|                             |                                 |                 |                           |             |       |         |       |                                           |                            |                            |          |          |          |          |
|-----------------------------|---------------------------------|-----------------|---------------------------|-------------|-------|---------|-------|-------------------------------------------|----------------------------|----------------------------|----------|----------|----------|----------|
| (Thalmann et al., 2007)     | <i>Gorilla</i>                  | G. gorilla      | G. beringei               | species     | 16    | seq     | 0.38  | text p. 151                               | Fst                        | (Excoffier et al., 2005)   | 0.349976 | 0.146907 | 0.141624 | 0.904762 |
| (Toju and Sota, 2009)       | <i>Curculio camelliae</i>       | HSK             | YKI                       | populations | 1     | seq     |       |                                           |                            |                            | 0.011962 | 0.02278  | 0.007329 | 0.037182 |
| (Tsai and Manos, 2010)      | <i>Epifagus virginiana</i>      | 13              | 9                         | populations | 11    | seq+STR |       |                                           |                            |                            | 0.021535 | 0.164384 | 0.63125  | 0.48     |
| (Tsai and Manos, 2010)      | <i>Epifagus virginiana</i>      | 13              | 6                         | populations | 11    | seq+STR |       |                                           |                            |                            | 0.9991   | 0.371134 | 0.2586   | 0.055684 |
| (Tsai and Manos, 2010)      | <i>Epifagus virginiana</i>      | 9               | 6                         | populations | 11    | seq+STR |       |                                           |                            |                            | 1.3314   | 1.333333 | 978.3167 | 0.002338 |
| (Wall et al., 2010)         | <i>Pyxidanthera</i>             | south           | north                     | populations | 1     | seq     | 0.173 | value for cpDNA in Table 1                | "Variance between regions" | (Excoffier et al., 2005)   | 0.016825 | 0.462407 | 0.987525 | 1.646561 |
| (Wang and Hey, 2010)        | <i>Drosophila</i>               | D. melanogaster | D. simulans               | species     | 30323 | seq     |       |                                           |                            |                            | 0.013375 | 6.213768 | 0        | 2.536982 |
| (Wang et al., 2008)         | <i>Neophocaena</i>              | N. phocaenoides | N. asieorientalis (sp. N) | species     | 5     | STR     | 0.48  | text p. 149                               | Rst                        | Hardy and Vekemans 2002    | 0.031    | 0.036774 | 0.25545  | 0.350769 |
| (Willis et al., 2010)       | <i>Cichla temensis</i>          | Orinoco         | Casquiare+Amazon          | populations | 1     | seq     |       |                                           |                            |                            | 0.009558 | 4.576271 | 0.658168 | 3.170254 |
| (Willis et al., 2010)       | <i>Cichla monoculus</i>         | Orinoco         | Casquiare+Amazon          | populations | 1     | seq     |       |                                           |                            |                            | 0.00228  | 3233.333 | 0.878294 | 2.434128 |
| (Willis et al., 2010)       | <i>Cichla orinocensis</i>       | Orinoco         | Casquiare+Amazon          | populations | 1     | seq     |       |                                           |                            |                            | 0.5327   | 2.509855 | 0.000171 | 3.453888 |
| (Wilson, 2006)              | <i>Syngnathus leptorhynchus</i> | CA              | WA                        | populations | 1     | seq     | 0.18  | Table 3                                   | Rst                        | ((Schneider et al., 1997)) | 1.364605 | 0.379203 | 0.022075 | 0.247792 |
| (Wilson, 2006)              | <i>Syngnathus leptorhynchus</i> | CA              | AK                        | populations | 1     | seq     | 0.477 | Table 3                                   | Rst                        | (Schneider et al., 1997)   | 1.776975 | 0.576124 | 0.005828 | 2.869498 |
| (Wilson, 2006)              | <i>Syngnathus leptorhynchus</i> | WA              | AK                        | populations | 1     | seq     | 0.259 | Table 3                                   | Rst                        | (Schneider et al., 1997)   | 588.4093 | 0.002506 | 0.001375 | 0.447273 |
| (Wilson and Veraguth, 2010) | <i>Syngnathus typhle</i>        | ASK             | KLU                       | populations | 2     | seq     | 0.12  | mean of mtDNA and nDNA values in Figure 2 | Fst                        | (Excoffier et al., 2005)   | 0.44     | 0.156379 | 0.44     | 0.167401 |
| (Wilson and Veraguth, 2010) | <i>Syngnathus typhle</i>        | RIA             | MUR                       | populations | 2     | seq     | 0.55  | mean of mtDNA and nDNA values in Figure 2 | Fst                        | (Excoffier et al., 2005)   | 0.07     | 0.801443 | 0.01     | 1.25368  |
| (Wilson and Veraguth, 2010) | <i>Syngnathus typhle</i>        | KLU             | ROS                       | populations | 2     | seq     | 0.25  | mean of mtDNA and nDNA values in Figure 2 | Fst                        | (Excoffier et al., 2005)   | 0.09     | 0.202179 | 1.65     | 0.202179 |
| (Wilson and Veraguth, 2010) | <i>Syngnathus typhle</i>        | ROS             | PED                       | populations | 2     | seq     | 0.42  | mean of mtDNA and nDNA values in Figure 2 | Fst                        | (Excoffier et al., 2005)   | 0.96     | 0.643004 | 0.01     | 1.619171 |
| (Wilson and Veraguth, 2010) | <i>Syngnathus typhle</i>        | MUR             | LIV                       | populations | 2     | seq     | 0.42  | mean of mtDNA and nDNA values in Figure 2 | Fst                        | (Excoffier et al., 2005)   | 0.01     | 1.110952 | 0.92     | 0.324028 |

|                                 |                                 |                    |                          |             |    |         |        |                                           |     |                            |          |          |          |          |
|---------------------------------|---------------------------------|--------------------|--------------------------|-------------|----|---------|--------|-------------------------------------------|-----|----------------------------|----------|----------|----------|----------|
| (Wilson and Veraguth, 2010)     | <i>Syngnathus typhle</i>        | LIV                | VEN                      | populations | 2  | seq     | 0.185  | mean of mtDNA and nDNA values in Figure 2 | Fst | (Excoffier et al., 2005)   | 4.37     | 0.305444 | 0.09     | 0.19474  |
| (Wilson and Veraguth, 2010)     | <i>Syngnathus typhle</i>        | PED                | GRO                      | populations | 2  | seq     | 0.34   | mean of mtDNA and nDNA values in Figure 2 | Fst | (Excoffier et al., 2005)   | 0.01     | 3.441667 | 1.66     | 1.147222 |
| (Wilson and Veraguth, 2010)     | <i>Syngnathus typhle</i>        | GRO                | RIA                      | populations | 2  | seq     | 0.32   | mean of mtDNA and nDNA values in Figure 2 | Fst | (Excoffier et al., 2005)   | 0.03     | 0.578067 | 1.16     | 0.314777 |
| (Wilson and Veraguth, 2010)     | <i>Syngnathus typhle</i>        | VEN                | ERD                      | populations | 2  | seq     | 0.36   | mean of mtDNA and nDNA values in Figure 2 | Fst | (Excoffier et al., 2005)   | 2.86     | 0.24007  | 0.03     | 284.7819 |
| (Wilson and Veraguth, 2010)     | <i>Syngnathus typhle</i>        | ERD                | ODE                      | populations | 2  | seq     | 0.02   | mean of mtDNA and nDNA values in Figure 2 | Fst | (Excoffier et al., 2005)   | 0.96     | 0.037105 | 51       | 0.017428 |
| (Won and Hey, 2005)             | <i>Pan</i>                      | <i>P. paniscus</i> | <i>P. t. verus</i>       | species     | 46 | seq     | 0.657  | calculated using raw data                 | Fst | (Hudson et al., 1992b)     | 0.00007  | 2.964789 | 0.00006  | 3.381526 |
| (Won and Hey, 2005)             | <i>Pan</i>                      | <i>P. paniscus</i> | <i>P. t. troglodytes</i> | species     | 46 | seq     | 0.561  | calculated using raw data                 | Fst | (Hudson et al., 1992b)     | 0.00048  | 3.338182 | 0.00017  | 1.366071 |
| (ZAMUDIO et al., 2009)          | <i>Trichogenes longipinnis</i>  | Camburi            | Paralelo Camburi         | populations | 7  | STR     | 0.222  | Table 3                                   | Fst | (Weir and Cockerham, 1984) | 0.464085 | 1        | 0.09174  | 0.323741 |
| (ZAMUDIO et al., 2009)          | <i>Trichogenes longipinnis</i>  | Paralelo Camburi   | RJ599 & Buracao          | populations | 7  | STR     | 0.405  | mean of values in Table 3                 | Fst | (Weir and Cockerham, 1984) | 0.30107  | 0.798319 | 0.119175 | 0.837004 |
| (ZAMUDIO et al., 2009)          | <i>Trichogenes longipinnis</i>  | Amor               | RJ599 & Buracao          | populations | 7  | STR     | 0.57   | mean of values in Table 3                 | Fst | (Weir and Cockerham, 1984) | 0.003443 | 5.686275 | 0.02805  | 0.852941 |
| (Zheng and Ge, 2010)            | <i>Oriza</i>                    | <i>O. nivara</i>   | <i>O. rufipogon</i>      | species     | 6  | seq     | 0.429  | mean of values in Table 3                 | Fst | (Excoffier et al., 2005)   | 0.491188 | 0.370276 | 2.52015  | 0.152997 |
| (Jaramillo Correa et al., 2010) | <i>Pinus pinaster</i>           | SS                 | M                        | populations | 2  | seq     |        |                                           |     |                            | 1.44205  | 3.509934 | 1.4001   | 13.58974 |
| (Lanterbecq et al., 2010)       | <i>Amblyrhynchus cristatus</i>  | southern           | northern                 | populations | 13 | seq+STR | 0.0197 | mean of values in Table 4                 |     | (Schneider et al., 2000)   | 2.819313 | 0        | 2.517975 | 0        |
| (McGovern et al., 2010)         | <i>Patiria miniata</i>          | WIN                | BAM                      | populations | 7  | seq     | 0.067  | mean of values in Table 3                 | Φct | (Excoffier et al., 2005)   | 6.6      | 0.016603 | 0.4      | 0.016792 |
| (McGovern et al., 2010)         | <i>Nucella lamellosa</i>        | CAM                | SJI                      | populations | 7  | seq     |        |                                           |     |                            | 1.8      | 1.372225 | 0        | 0.43038  |
| (Sly et al., 2010)              | <i>Phaenicoophilus palmarum</i> | palmarum           | poliocephalus            | species     | 4  | seq     |        |                                           |     |                            | 0.1953   | 0        | 0.0245   | 0        |

Table legend:

Taxon 1 and Taxon 2 refer to the two groups (identified in the study) that were used in the IM analysis

Rank refers to the rank of the units identified as Taxon 1 and Taxon 2 that were used in this analysis.

# loci is the number of genetic loci used in the IM analysis

Type of loci: 'seq' for DNA sequence loci, STR for short tandem repeat (microsatellite). In most cases when one or more DNA sequence loci are included, the mtDNA is represented as one of the loci.

Fst refers to the value for the estimated proportion of the overall variation found among the Taxon 1 and Taxon 2 groups that is due to differentiation between those two groups

Fst Source refers to the location in the paper where the Fst values were found (or how they were calculated), or to personal communication with one of the authors

Fst ID refers to the label used in the paper to refer to this value.

Fst Citation refers to the references given in the paper to the type of value being calculated.

2N1M1 refers to the *2NM* estimate for Taxon 1

$\tau_1$  refers to the estimate of  $\tau$  for Taxon 1

2N2M2 refers to the *2NM* estimate for Taxon 2

$\tau_2$  refers to the estimate of  $\tau$  for Taxon 2

Balakrishnan, C. N., and S. V. Edwards. 2009. Nucleotide Variation, Linkage Disequilibrium and Founder-Facilitated Speciation in Wild Populations of the Zebra Finch (*Taeniopygia guttata*). *Genetics*, 181:645-660.

Berner, D., A. Grandchamp, and A. Hendry. 2009. Variable progress toward ecological speciation in parapatry: stickleback across eight lake stream transitions. *Evolution*, 63:1740-1753.

Boisselier-Dubayle, M. C., R. Leblois, S. Samadi, J. Lambourdiere, and C. Sarthou. 2010. Genetic structure of the xerophilous bromeliad *Pitcairnia geyskesii* on inselbergs in French Guiana - a test of the forest refuge hypothesis. *Ecography*, 33:175-184.

Bolnick, D., E. Caldera, and B. Matthews. 2008. Evidence for asymmetric migration load in a pair of ecologically divergent stickleback populations. *Biological Journal of the Linnean Society*, 94:273-287.

Bowie, R. C. K., J. Fjeldsa, and J. Kiure. 2009. Multilocus molecular DNA variation in Winifred's Warbler *Scepomycter winifredae* suggests cryptic speciation and the existence of a threatened species in the Rubeho-Ukaguru Mountains of Tanzania. *Ibis*, 151:709-719.

Bull, V., M. Beltrán, C. Jiggins, W. McMillan, E. Bermingham, and J. Mallet. 2006. Polyphyly and gene flow between non-sibling *Heliconius* species. *Bmc Biology*, 4:11.

Carling, M. D., I. J. Lovette, and R. T. Brumfield. 2010. HISTORICAL DIVERGENCE AND GENE FLOW: COALESCENT ANALYSES OF MITOCHONDRIAL, AUTOSOMAL AND SEX-LINKED LOCI IN PASSERINA BUNTINGS. *Evolution*, 64:1762-1772.

- Carneiro, M., N. Ferrand, and M. Nachman. 2009. Recombination and speciation: loci near centromeres are more differentiated than loci near telomeres between subspecies of the European rabbit (*Oryctolagus cuniculus*). *Genetics*, 181:593.
- Carstens, B., and T. Dewey. 2010. Species Delimitation Using a Combined Coalescent and Information-Theoretic Approach: An Example from North American *Myotis* Bats. *Systematic Biology*.
- Carstens, B., and L. Knowles. 2007. Shifting distributions and speciation: species divergence during rapid climate change. *Molecular Ecology*, 16:619-627.
- Carstens, B. C., H. N. Stoute, and N. M. Reid. 2009. An information-theoretical approach to phylogeography. *Molecular Ecology*, 18:4270-4282.
- Chen, J., T. Kallman, N. Gyllenstrand, and M. Lascoux. 2010. New insights on the speciation history and nucleotide diversity of three boreal spruce species and a Tertiary relict. *Heredity*, 104:3-14.
- Coelho, M., F. Sequeira, D. Luiselli, S. Beleza, and J. Rocha. 2009. On the edge of Bantu expansions: mtDNA, Y chromosome and lactase persistence genetic variation in southwestern Angola. *Bmc Evolutionary Biology*, 9:80.
- Cox, M., A. Woerner, J. Wall, and M. Hammer. 2008. Intergenic DNA sequences from the human X chromosome reveal high rates of global gene flow. *Bmc Genetics*, 9:76.
- CRANDALL, E., M. FREY, R. GROSBERG, and P. BARBER. 2008. Contrasting demographic history and phylogeographical patterns in two Indo Pacific gastropods. *Molecular Ecology*, 17:611-626.
- de Bruyn, M., B. L. Hall, L. F. Chauke, C. Baroni, P. L. Koch, and A. R. Hoelzel. 2009. Rapid Response of a Marine Mammal Species to Holocene Climate and Habitat Change. *Plos Genetics*, 5.
- De Busschere, C., F. Hendrickx, S. M. Van Belleghem, T. Backeljau, L. Lens, and L. Baert. 2010. Parallel habitat specialization within the wolf spider genus *Hogna* from the Galapagos. *Molecular Ecology*, 19:4029-4045.
- Dolman, G., and C. Moritz. 2006. A multilocus perspective on refugial isolation and divergence in rainforest skinks (*Carlia*). *Evolution*, 60:573-582.
- DRUMMOND, C., and M. HAMILTON. 2007. Hierarchical components of genetic variation at a species boundary: population structure in two sympatric varieties of *Lupinus microcarpus* (Leguminosae). *Molecular Ecology*, 16:753-769.
- Duda, T., and T. Lee. 2009. Isolation and population divergence of a widespread Indo-West Pacific marine gastropod at Easter Island. *Marine Biology*, 156:1193-1202.
- Duda, T. F., and H. A. Lessios. 2009. Connectivity of populations within and between major biogeographic regions of the tropical Pacific in *Conus ebraeus*, a widespread marine gastropod. *Coral Reefs*, 28:651-659.
- Dyer, R. J. 2009. GeneticStudio: a suite of programs for spatial analysis of genetic marker data. *Molecular Ecology Resources*, 9:110-113.
- ECKERT, A., B. TEARSE, and B. HALL. 2008. A phylogeographical analysis of the range disjunction for foxtail pine (*Pinus balfouriana*, Pinaceae): the role of Pleistocene glaciation. *Molecular Ecology*, 17:1983-1997.
- Elmer, K. R., T. K. Lehtonen, A. F. Kautt, C. Harrod, and A. Meyer. 2010. Rapid sympatric ecological differentiation of crater lake cichlid fishes within historic times. *Bmc Biology*, 8.
- Excoffier, L., G. Laval, and S. Schneider. 2005. Arlequin ver. 3.0: An integrated software package for population genetics data analysis. *Evolutionary Bioinformatics Online*, 1.
- Excoffier, L., P. E. Smouse, and J. M. Quattro. 1992. Analysis of molecular variance inferred from metric distances among DNA haplotypes: applications to human mitochondrial DNA restriction data. *Genetics*, 131:479-491.
- Farias, I. P., J. P. Torrico, C. Garcia-Davila, M. D. F. Santos, T. Hrbek, and J. F. Renno. 2010. Are rapids a barrier for floodplain fishes of the Amazon basin? A demographic study of the keystone floodplain species *Colossoma macropomum* (Teleostei: Characiformes). *Molecular Phylogenetics and Evolution*, 56:1129-1135.
- Faure, B., D. Jollivet, A. Tanguy, F. Bonhomme, and N. Bierne. 2009. Speciation in the Deep Sea: Multi-Locus Analysis of Divergence and Gene Flow between Two Hybridizing Species of Hydrothermal Vent Mussels. *Plos One*, 4.

- Fontaine, M., S. Baird, S. Piry, N. Ray, K. Tolley, S. Duke, A. Birkun, M. Ferreira, T. Jauniaux, and Á. Llavona. 2007. Rise of oceanographic barriers in continuous populations of a cetacean: the genetic structure of harbour porpoises in Old World waters. *BMC Biology*, 5:30.
- Fontaine, M. C., K. A. Tolley, J. R. Michaux, A. Birkun, M. Ferreira, T. Jauniaux, A. Llavona, B. Ozturk, A. A. Ozturk, V. Ridoux, E. Rogan, M. Sequeira, J. M. Bouqueneau, and S. J. E. Baird. 2010. Genetic and historic evidence for climate-driven population fragmentation in a top cetacean predator: the harbour porpoises in European water. *Proceedings of the Royal Society B-Biological Sciences*, 277:2829-2837.
- Garrigan, D., S. Kingan, M. Pilkington, J. Wilder, M. Cox, H. Soodyall, B. Strassmann, G. Destro-Bisol, P. De Knijff, and A. Novelletto. 2007. Inferring human population sizes, divergence times and rates of gene flow from mitochondrial, X and Y chromosome resequencing data. *Genetics*, 177:2195.
- Geraldes, A., P. Basset, B. Gibson, K. Smith, B. Harr, H. YU, N. Bulatova, Y. Ziv, and M. Nachman. 2008. Inferring the history of speciation in house mice from autosomal, X linked, Y linked and mitochondrial genes. *Molecular Ecology*, 17:5349-5363.
- Gladieux, P., V. Caffier, M. Devaux, and B. Le Cam. 2010a. Host-specific differentiation among populations of *Venturia inaequalis* causing scab on apple, pyracantha and loquat. *Fungal Genetics and Biology*, 47:511-521.
- Gladieux, P., X. G. Zhang, I. Roldan-Ruiz, V. Caffier, T. Leroy, M. Devaux, S. Van Glabeke, E. Coart, and B. Le Cam. 2010b. Evolution of the population structure of *Venturia inaequalis*, the apple scab fungus, associated with the domestication of its host. *Molecular Ecology*, 19:658-674.
- Hansen, M., D. Fraser, T. Als, and K. Mensberg. 2008. Reproductive isolation, evolutionary distinctiveness and setting conservation priorities: The case of European lake whitefish and the endangered North Sea houting(*Coregonus* spp.). *Bmc Evolutionary Biology*, 8:137.
- Hansson, B., D. Hasselquist, M. Tarka, P. Zehndjiev, and S. Bensch. 2008. Postglacial Colonisation Patterns and the Role of Isolation and Expansion in Driving Diversification in a Passerine Bird. *Plos One*, 3.
- Hardy, O. J., and X. Vekemans. 2002. SPAGeDi: a versatile computer program to analyse spatial genetic structure at the individual or population levels. *Molecular Ecology Notes*, 2:618-620.
- Hey, J., and R. Nielsen. 2004. Multilocus methods for estimating population sizes, migration rates and divergence time, with applications to the divergence of *Drosophila pseudoobscura* and *D. persimilis*. *Genetics*, 167:747.
- Hird, S., N. Reid, J. Demboski, and J. Sullivan. 2010. Introgression at differentially aged hybrid zones in red-tailed chipmunks. *Genetica*, 138:869-883.
- Hudson, R., D. D. Boos, and N. Kaplan. 1992a. A statistical test for detecting geographic subdivision. *Molecular Biology and Evolution*, 9:138-151.
- Hudson, R. R., M. Slatkin, and W. P. Maddison. 1992b. Estimation of levels of gene flow from DNA sequence data. *Genetics*, 132:583-589.
- Ikeda, H., N. Fujii, and H. Setoguchi. 2009. Application of the Isolation with Migration Model Demonstrates the Pleistocene Origin of Geographic Differentiation in *Cardamine nipponica* (Brassicaceae), an Endemic Japanese Alpine Plant. *Molecular Biology and Evolution*, 26:2207-2216.
- Jaramillo Correa, J. P., D. Grivet, A. Terrab, Y. Kurt, A. I. De Lucas, N. Wahid, G. G. Vendramin, and S. C. González-Martínez. 2010. The Strait of Gibraltar as a major biogeographic barrier in Mediterranean conifers: a comparative phylogeographic survey. *Molecular Ecology*.
- Johnson, J., R. Thorstrom, and D. Mindell. 2007. Systematics and conservation of the hook billed kite including the island taxa from Cuba and Grenada. *Animal Conservation*, 10:349-359.
- KING, M., and E. ROALSON. 2009. Discordance between phylogenetics and coalescent based divergence modelling: exploring phylogeographic patterns of speciation in the *Carex macrocephala* species complex. *Molecular Ecology*, 18:468-482.
- Kobl Müller, S., N. Duftner, K. Sefc, U. Aigner, M. Rogetzer, and C. Sturmbauer. 2009. Phylogeographic structure and gene flow in the scale eating cichlid *Perissodus microlepis* (Teleostei, Perciformes, Cichlidae) in southern Lake Tanganyika. *Zoologica Scripta*, 38:257-268.
- Kondo, B., J. Peters, B. Rosensteel, and K. Omland. 2008. Coalescent analyses of multiple loci support a new route to speciation in birds. *Evolution*, 62:1182-1191.
- Koopman, M. M., and B. C. Carstens. 2010. Conservation genetic inferences in the carnivorous pitcher plant *Sarracenia alata* (Sarraceniaceae). *Conservation Genetics*, 11:2027-2038.
- Kotlík, P., S. Markov, L. CHOLEVA, N. BOGUTSKAYA, F. Ekmekci, and P. IVANOVA. 2008. Divergence with gene flow between Ponto-Caspian refugia in an anadromous cyprinid *Rutilus frisii* revealed by multiple gene phylogeography. *Molecular Ecology*, 17:1076-1088.

- Kronforst, M., L. Young, L. Blume, and L. Gilbert. 2006. Multilocus analyses of admixture and introgression among hybridizing *Heliconius* butterflies. *Evolution*, 60:1254-1268.
- Lanterbecq, D., S. Glaberman, M. N. Vitousek, S. Steinfartz, E. Benavides, M. Wikelski, and A. Caccone. 2010. Genetic Differentiation between Marine Iguanas from Different Breeding Sites on the Island of Santa Fé (Galápagos Archipelago). *Journal of Heredity*, 101:663.
- LAWTON RAUH, A., R. Robichaux, and M. Purugganan. 2007. Diversity and divergence patterns in regulatory genes suggest differential gene flow in recently derived species of the Hawaiian silversword alliance adaptive radiation (Asteraceae). *Molecular Ecology*, 16:3995-4013.
- LEACHÉ, A., and D. MULCAHY. 2007. Phylogeny, divergence times and species limits of spiny lizards (*Sceloporus magister* species group) in western North American deserts and Baja California. *Molecular Ecology*, 16:5216-5233.
- Lee, J., and S. Edwards. 2008. Divergence across Australia's Carpentarian barrier: statistical phylogeography of the red-backed fairy wren (*Malurus melanocephalus*). *Evolution*, 62:3117-3134.
- Li, J. W., C. K. L. Yeung, P. W. Tsai, R. C. Lin, C. F. Yeh, C. T. Yao, L. X. Han, L. M. Hung, P. Ding, Q. S. Wang, and S. H. Li. 2010. Rejecting strictly allopatric speciation on a continental island: prolonged postdivergence gene flow between Taiwan (*Leucodioptron taewanus*, Passeriformes Timaliidae) and Chinese (*L. canorum canorum*) hwameis. *Molecular Ecology*, 19:494-507.
- Lopes, J. S., and S. Boessenkool. 2010. The use of approximate Bayesian computation in conservation genetics and its application in a case study on yellow-eyed penguins. *Conservation Genetics*, 11:421-433.
- Lynch, M., and T. J. Crease. 1990. The analysis of population survey data on DNA sequence variation. *Mol Biol Evol*, 7:377-94.
- Malausa, T., L. Leniaud, J. Martin, P. Audiot, D. Bourguet, S. Ponsard, S. Lee, R. Harrison, and E. Dopman. 2007. Molecular differentiation at nuclear loci in French host races of the European corn borer (*Ostrinia nubilalis*). *Genetics*, 176:2343.
- Maley, J. M., and K. Winker. 2010. Diversification at high latitudes: speciation of buntings in the genus *Plectrophenax* inferred from mitochondrial and nuclear markers. *Molecular Ecology*, 19:785-797.
- Mao, X. G., J. P. Zhang, S. Y. Zhang, and S. J. Rossiter. 2010. Historical male-mediated introgression in horseshoe bats revealed by multilocus DNA sequence data. *Molecular Ecology*, 19:1352-1366.
- Marko, P. B., J. M. Hoffman, S. A. Emme, T. M. McGovern, C. C. Keever, and L. N. Cox. 2010. The 'Expansion-Contraction' model of Pleistocene biogeography: rocky shores suffer a sea change? *Molecular Ecology*, 19:146-169.
- Maroja, L. S., J. A. Andres, and R. G. Harrison. 2009. GENEALOGICAL DISCORDANCE AND PATTERNS OF INTROGRESSION AND SELECTION ACROSS A CRICKET HYBRID ZONE. *Evolution*, 63:2999-3015.
- Martínez-Cruz, B., and J. Godoy. 2007. Genetic evidence for a recent divergence and subsequent gene flow between Spanish and Eastern imperial eagles. *Bmc Evolutionary Biology*, 7:170.
- Mazzoni, C., A. Araki, G. Ferreira, R. Azevedo, G. Barbuji, and A. Peixoto. 2008. Multilocus analysis of introgression between two sand fly vectors of leishmaniasis. *Bmc Evolutionary Biology*, 8:141.
- McGovern, T. M., C. C. Keever, C. A. Sasaki, M. W. Hart, and P. B. Marko. 2010. Divergence genetics analysis reveals historical population genetic processes leading to contrasting phylogeographic patterns in co distributed species. *Molecular Ecology*, 19:5043-5060.
- Morgan, K., Y. M. Linton, P. Somboon, P. Saikia, V. Dev, D. Socheat, and C. Walton. 2010. Inter-specific gene flow dynamics during the Pleistocene-dated speciation of forest-dependent mosquitoes in Southeast Asia. *Molecular Ecology*, 19:2269-2285.
- Mullen, S., E. Dopman, and R. Harrison. 2008. HYBRID ZONE ORIGINS, SPECIES BOUNDARIES, AND THE EVOLUTION OF WING PATTERN DIVERSITY IN A POLYTYPIC SPECIES COMPLEX OF NORTH AMERICAN ADMIRAL BUTTERFLIES (NYMPHALIDAE: LIMENITIS). *Evolution*, 62:1400-1417.
- Nadachowska, K., and W. Babik. 2009. Divergence in the face of gene flow: the case of two newts (Amphibia: Salamandridae). *Molecular Biology and Evolution*, 26:829.
- NAGATA, N., K. KUBOTA, Y. TAKAMI, and T. SOTA. 2009. Historical divergence of mechanical isolation agents in the ground beetle *Carabus arrowianus* as revealed by phylogeographical analyses. *Molecular Ecology*, 18:1408-1421.

- Nei, M. 1973. Analysis of Gene Diversity in Subdivided Populations. *Proceedings of the National Academy of Sciences*, 70:3321-3323.
- Noonan, B., and P. Gaucher. 2005. Phylogeography and demography of Guianan harlequin toads (*Atelopus*): diversification within a refuge. *Molecular Ecology*, 14:3017-3031.
- Norgate, M., J. Chamings, A. Pavlova, J. K. Bull, N. D. Murray, and P. Sunnucks. 2009. Mitochondrial DNA Indicates Late Pleistocene Divergence of Populations of *Heteronympha merope*, an Emerging Model in Environmental Change Biology. *Plos One*, 4.
- O'Corry-Crowe, G., C. Lydersen, M. P. Heide-Jorgensen, L. Hansen, L. M. Mukhametov, O. Dove, and K. M. Kovacs. 2010. Population genetic structure and evolutionary history of North Atlantic beluga whales (*Delphinapterus leucas*) from West Greenland, Svalbard and the White Sea. *Polar Biology*, 33:1179-1194.
- Ohshima, I., and K. Yoshizawa. 2010. Differential introgression causes genealogical discordance in host races of *Acrocercops transecta* (Insecta: Lepidoptera). *Molecular Ecology*, 19:2106-2119.
- Omilian, A. R., and M. Lynch. 2009. Patterns of Intraspecific DNA Variation in the *Daphnia* Nuclear Genome. *Genetics*, 182:325-336.
- Oosterhout, C., D. Joyce, S. Cummings, J. Blais, N. Barson, I. Ramnarine, R. Mohammed, N. Persad, and J. Cable. 2006. Balancing selection, random genetic drift, and genetic variation at the major histocompatibility complex in two wild populations of guppies (*Poecilia reticulata*). *Evolution*, 60:2562-2574.
- Osada, N., Y. Uno, K. Mineta, Y. Kameoka, I. Takahashi, and K. Terao. 2010. Ancient genome-wide admixture extends beyond the current hybrid zone between *Macaca fascicularis* and *M. mulatta*. *Molecular Ecology*, 19:2884-2895.
- Pavey, S. A., J. L. Nielsen, and T. R. Hamon. 2010. RECENT ECOLOGICAL DIVERGENCE DESPITE MIGRATION IN SOCKEYE SALMON (*ONCORHYNCHUS NERKA*). *Evolution*, 64:1773-1783.
- Peters, J., W. Gretes, and K. Omland. 2005. Late Pleistocene divergence between eastern and western populations of wood ducks (*Aix sponsa*) inferred by the 'isolation with migration' coalescent method. *Molecular Ecology*, 14:3407-3418.
- Peters, J., Y. Zhuravlev, I. Fefelov, E. Humphries, and K. Omland. 2008. Multilocus phylogeography of a Holarctic duck: colonization of North America from Eurasia by gadwall (*Anas strepera*). *Evolution*, 62:1469-1483.
- Peters, J., Y. Zhuravlev, I. Fefelov, A. Logie, and K. Omland. 2007. Nuclear loci and coalescent methods support ancient hybridization as cause of mitochondrial paraphyly between gadwall and falcated duck (*Anas* spp.). *Evolution*, 61:1992-2006.
- Rawson, P., and F. Harper. 2009. Colonization of the northwest Atlantic by the blue mussel, *Mytilus trossulus* postdates the last glacial maximum. *Marine Biology*, 156:1857-1868.
- Riginos, C. 2005. Cryptic vicariance in Gulf of California fishes parallels vicariant patterns found in Baja California mammals and reptiles. *Evolution*, 59:2678-2690.
- Rona, L. D. P., C. J. Carvalho-Pinto, C. J. Mazzoni, and A. A. Peixoto. 2010. Estimation of divergence time between two sibling species of the *Anopheles* (*Kerteszia*) *cruzii* complex using a multilocus approach. *Bmc Evolutionary Biology*, 10.
- Russell, A., S. Goodman, and M. Cox. 2008a. Coalescent analyses support multiple mainland-to-island dispersals in the evolution of Malagasy *Triaenops* bats (Chiroptera: Hipposideridae). *Journal of Biogeography*, 35:995-1003.
- Russell, A., S. Goodman, I. Fiorentino, and A. Yoder. 2008b. Population genetic analysis of *Myzopoda* (Chiroptera: Myzopodidae) in Madagascar. *Journal of Mammalogy*, 89:209-221.
- Salazar, C., C. Jiggins, J. Taylor, M. Kronforst, and M. Linares. 2008. Gene flow and the genealogical history of *Heliconius heurippa*. *Bmc Evolutionary Biology*, 8:132.
- Schneider, S., J. M. Kueffer, D. Roessli, and L. Excoffier. 1997. Arlequin ver. 1.1. *University of Geneva*.
- Schneider, S., D. Roessli, and L. Excoffier. 2000. Arlequin: a software for population genetics data analysis. *User manual ver*, 2:2496-2497.
- Schoville, S. D., and G. K. Roderick. 2009. Alpine biogeography of Parnassian butterflies during Quaternary climate cycles in North America. *Molecular Ecology*, 18:3471-3485.
- Slatkin, M. 1995. A measure of population subdivision based on microsatellite allele frequencies. *Genetics*, 139:457-62.



- Sly, N. D., A. K. Townsend, C. C. Rimmer, J. M. Townsend, S. C. Latta, and I. J. Lovette. 2010. Phylogeography and conservation of the endemic Hispaniolan palm-tanagers (Aves: Phaenicophilus). *Conservation Genetics*:1-9.
- Storchova, R., J. Reif, and M. W. Nachman. 2010. FEMALE HETEROGAMETY AND SPECIATION: REDUCED INTROGRESSION OF THE Z CHROMOSOME BETWEEN TWO SPECIES OF NIGHTINGALES. *Evolution*, 64:456-471.
- Strasburg, J., and L. Rieseberg. 2008. MOLECULAR DEMOGRAPHIC HISTORY OF THE ANNUAL SUNFLOWERS HELIANTHUS ANNUUS AND H. PETIOLARIS—LARGE EFFECTIVE POPULATION SIZES AND RATES OF LONG TERM GENE FLOW. *Evolution*, 62:1936-1950.
- Stukenbrock, E., S. Banke, M. Javan-Nikkhah, and B. McDonald. 2007. Origin and domestication of the fungal wheat pathogen *Mycosphaerella graminicola* via sympatric speciation. *Molecular Biology and Evolution*, 24:398.
- Tamura, K., and M. Nei. 1993. Estimation of the Number of Nucleotide Substitutions in the Control Region of Mitochondrial DNA in Humans and Chimpanzees. *Molecular Biology and Evolution*, 10:512-526.
- Taylor, E., E. Lowery, A. Lilliestr le, A. Elz, and T. Quinn. 2008. Genetic analysis of sympatric char populations in western Alaska: Arctic char (*Salvelinus alpinus*) and Dolly Varden (*Salvelinus malma*) are not two sides of the same coin. *Journal of Evolutionary Biology*, 21:1609-1625.
- Thalmann, O., A. Fischer, F. Lankester, S. P  bo, and L. Vigilant. 2007. The complex evolutionary history of gorillas: insights from genomic data. *Molecular Biology and Evolution*, 24:146.
- Toju, H., and T. Sota. 2009. Do arms races punctuate evolutionary stasis? Unified insights from phylogeny, phylogeography and microevolutionary processes. *Molecular Ecology*, 18:3940-3954.
- Tsai, Y. H. E., and P. S. Manos. 2010. Host density drives the postglacial migration of the tree parasite, *Epifagus virginiana*. *Proceedings of the National Academy of Sciences of the United States of America*, 107:17035-17040.
- Viaud-Mart nez, K., M. Vergara, P. Gol'din, V. Ridoux, A.  zt rk, B.  zt rk, P. Rosel, A. Frantzis, A. Komnenou, and A. Bohonak. 2007. Morphological and genetic differentiation of the Black Sea harbour porpoise *Phocoena phocoena*. *Marine Ecology Progress Series*, 338:281-294.
- Wall, W. A., N. A. Douglas, Q. Y. Xiang, W. A. Hoffmann, T. R. Wentworth, and M. G. Hohmann. 2010. Evidence for range stasis during the latter Pleistocene for the Atlantic Coastal Plain endemic genus, *Pyxidantha Michaux*. *Molecular Ecology*, 19:4302-4314.
- Wang, J., T. Frasier, S. Yang, and B. White. 2008. Detecting recent speciation events: the case of the finless porpoise (genus *Neophocaena*). *Heredity*, 101:145-155.
- Wang, Y., and J. Hey. 2010. Estimating Divergence Parameters With Small Samples From a Large Number of Loci. *Genetics*, 184:363-79.
- Weir, B. S., and C. C. Cockerham. 1984. Estimating F-statistics for the analysis of population structure. *Evolution*, 38:1358-1370.
- Willis, S. C., M. Nunes, C. G. Montana, I. P. Farias, G. Orti, and N. R. Lovejoy. 2010. The Casiquiare river acts as a corridor between the Amazonas and Orinoco river basins: biogeographic analysis of the genus *Cichla*. *Molecular Ecology*, 19:1014-1030.
- Wilson, A. 2006. Genetic signature of recent glaciation on populations of a near shore marine fish species (*Syngnathus leptorhynchus*). *Molecular Ecology*, 15:1857-1871.
- Wilson, A. B., and I. E. Veraguth. 2010. The impact of Pleistocene glaciation across the range of a widespread European coastal species. *Molecular Ecology*, 19:4535-4553.
- Won, Y., and J. Hey. 2005. Divergence population genetics of chimpanzees. *Molecular Biology and Evolution*, 22:297.
- ZAMUDIO, K., J. ROBERTSON, L. CHAN, and I. SAZIMA. 2009. Population structure in the catfish *Trichogenes longipinnis*: drift offset by asymmetrical migration in a tiny geographic range. *Biological Journal of the Linnean Society*, 97:259-274.
- Zheng, X. M., and S. Ge. 2010. Ecological divergence in the presence of gene flow in two closely related *Oryza* species (*Oryza rufipogon* and *O. nivara*). *Molecular Ecology*, 19:2439-2454.
